# Supplementary material for: Alkylammonium bis(trifluoromethylsulfonyl)imide as a dopant in the hole-transporting layer for efficient and stable perovskite solar cells
Source: Royal Society of Chemistry journal article supplement (doi:10.1039/d2ee04045j), 2023-01-01
Supplement: d2ee04045j1.pdf [file d2ee04045j1.pdf]

**Alkylammonium bis(trifluoromethylsulfonyl)imide as a dopant in the hole-transporting layer for efficient and stable perovskite solar cells**

Youngwoong Kim<sup>a, †</sup>, Geunjin Kim<sup>a, †</sup>, Eun Young Park<sup>a</sup>, Chan Su Moon<sup>a</sup>, Seung Joo Lee<sup>a</sup>, Jason J. Yoo<sup>a</sup>, Seongsik Nam<sup>a, b</sup>, Jino Im<sup>c</sup>, Seong Sik Shin<sup>a, b</sup>, Nam Joong Jeon<sup>a, \*</sup>, and Jangwon Seo<sup>a, d, \*</sup>

<sup>a</sup>Division of Advanced Materials, Korea Research Institute of Chemical Technology (KRICT), Daejeon 34114, Republic of Korea

<sup>b</sup>SKKU Advanced Institute of Nanotechnology (SAINT) and Department of Nanoengineering, Sungkyunkwan University, Suwon 16419, Republic of Korea

<sup>c</sup>Chemical Data-Driven Research Center, Korea Research Institute of Chemical Technology (KRICT), Daejeon 34114, Republic of Korea

<sup>d</sup>Department of Chemical and Biomolecular Engineering, Korea Advanced Institute of Science and Technology (KAIST), Daejeon 34141, Republic of Korea

<sup>†</sup>Y. Kim and G. Kim contributed equally to this work.

Email: njjeon@kRICT.re.kr, jwseo@kaist.ac.kr

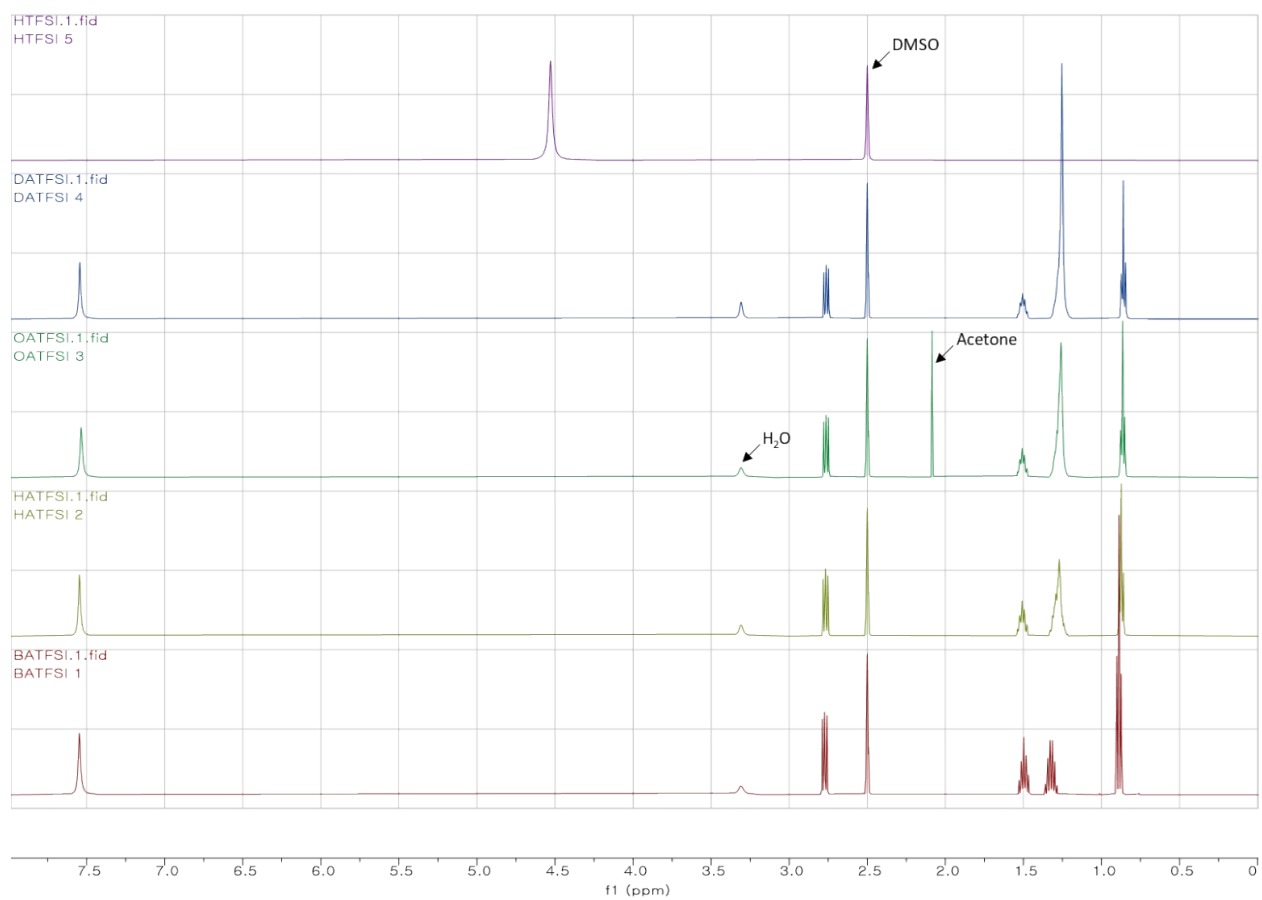

**Fig. S1.** <sup>1</sup>H NMR spectrum of ionic liquid dopants

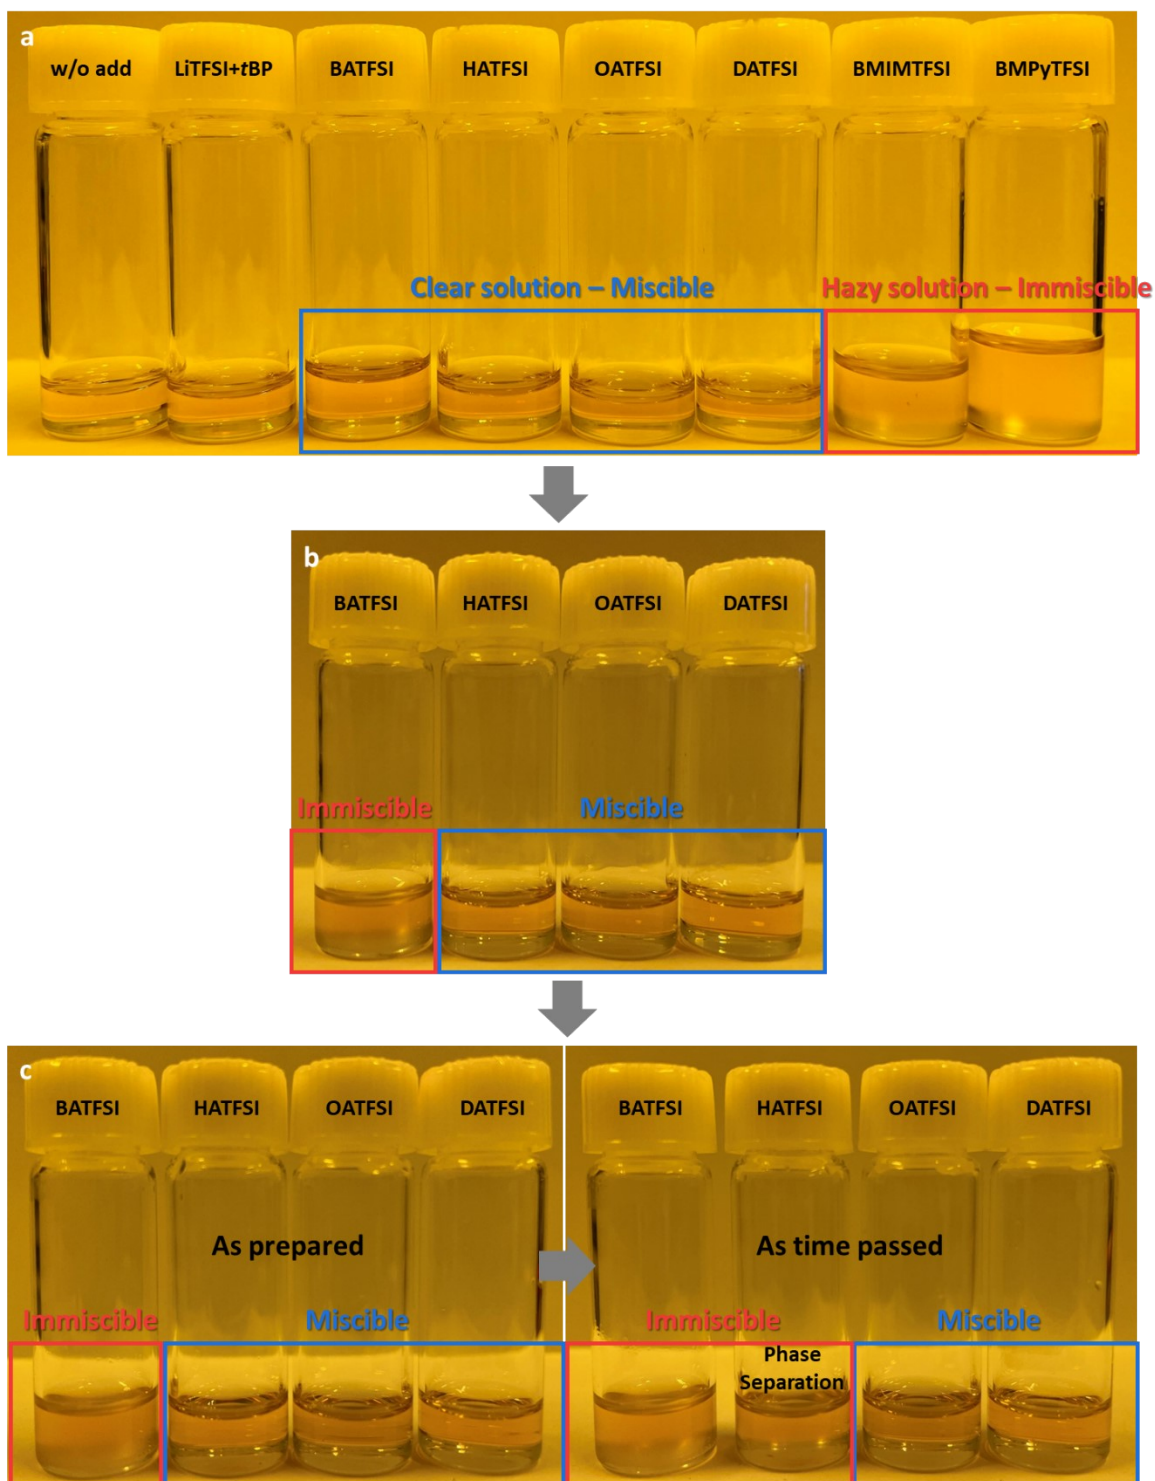

**Fig. S2.** Photographs of PTAA solutions (a) without dopant or with LiTFSI+tBP and 9.75 mM of IL dopants, (b) 24.37 mM of IL dopants, and (c) 80.41 mM of IL dopants

| Dopant concentration (mM) <sup>a</sup> | BATFSI | HATFSI | OATFSI | DATFSI |
|----------------------------------------|--------|--------|--------|--------|
| 9.75                                   | O      | O      | O      | O      |
| 24.37                                  | X      | O      | O      | O      |
| 60.92                                  | X      | O      | O      | O      |
| 80.41                                  | X      | X      | O      | O      |
| 121.84                                 | X      | X      | O      | O      |
| 243.67                                 | X      | X      | O      | O      |
| 304.59                                 | X      | X      | X      | X      |

**Table S1.** Miscibility test of alkylammonium TFSIs in PTAA solutions

<sup>a</sup>The solutions are also containing PTAA at 10mg ml<sup>-1</sup>.

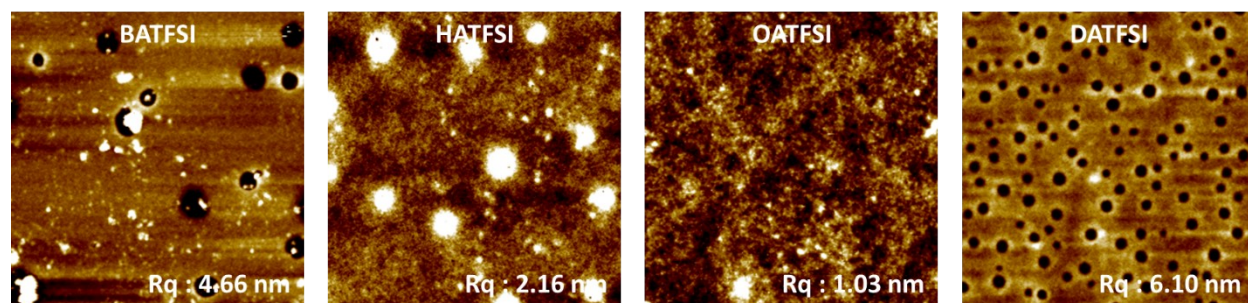

**Fig. S3.** AFM images (5  $\mu\text{m} \times 5 \mu\text{m}$ ) of PTAA containing the same concentration of alkylammonium TFSI dopants with different alkyl chain lengths

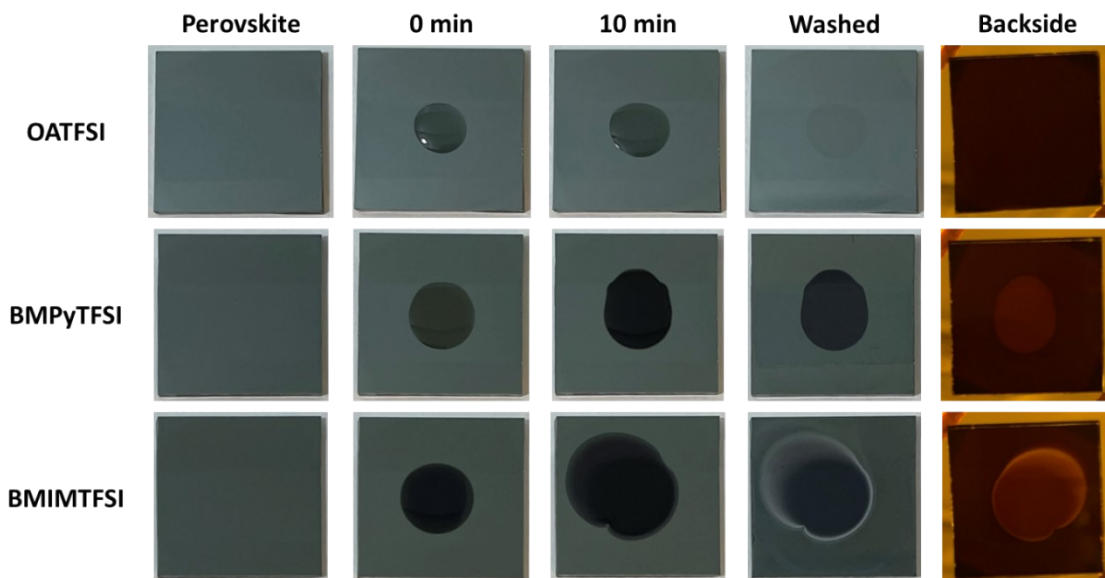

**Fig. S4.** Photographs of perovskite layers with droplets of OATFSI, BMPyTFSI, and BMIMTFSI

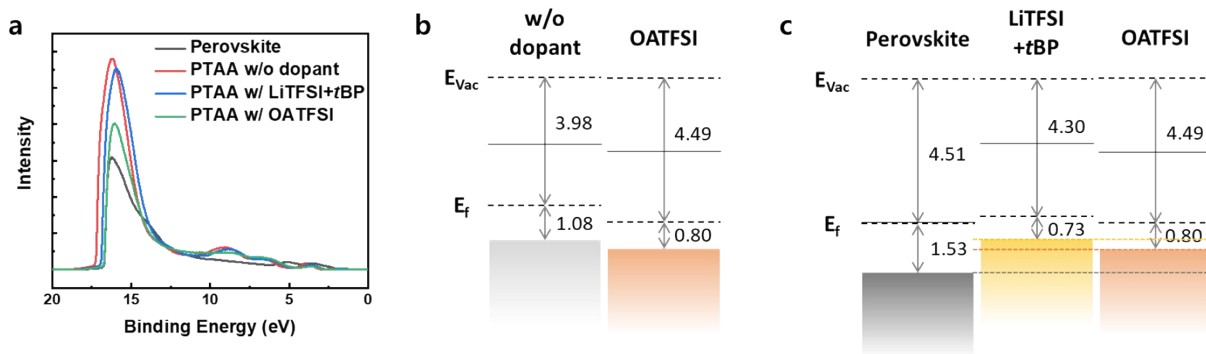

**Fig. S5.** (a) UPS spectra for perovskite, PTAA with or without various dopants, (b) change of energy level for PTAA in present/absence of OATFSI, and (c) energy level alignments of perovskite and PTAA with LiTFSI+tBP or OATFSI.

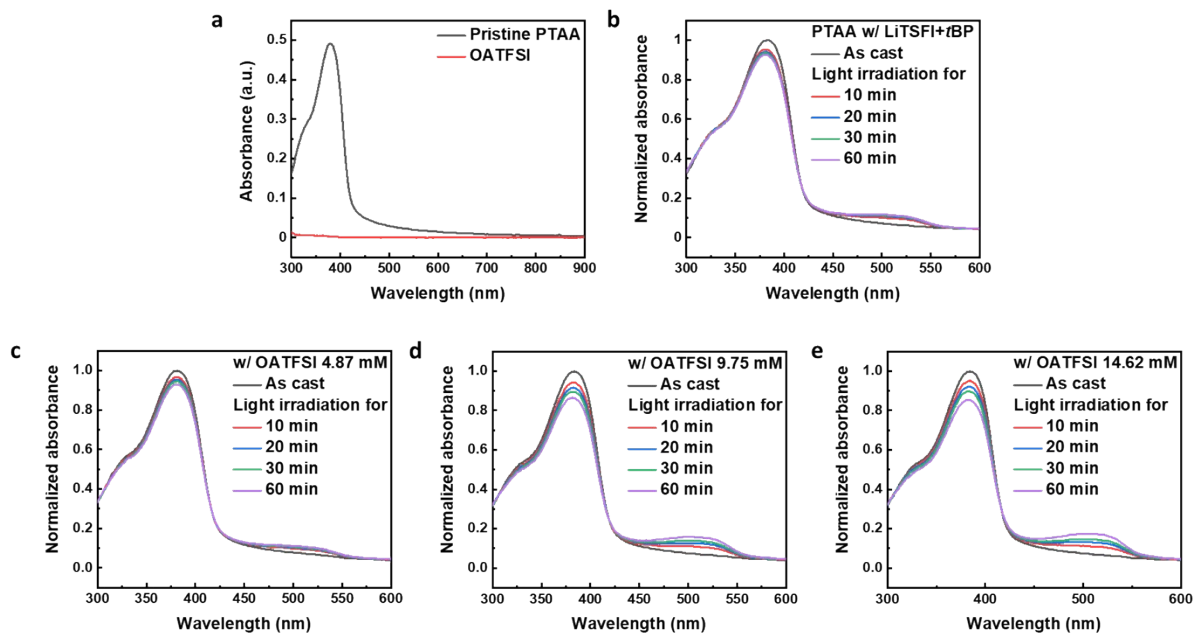

**Fig. S6.** UV-vis spectra of (a) pristine PTAA in film state (prepared from 10 mg ml<sup>-1</sup> of PTAA solution in toluene) and pristine OATFSI in solution state (9.75 mM of OATFSI in toluene) and change of UV-Vis absorption spectra for (b) PTAA film with LiTFSI+tBP and (c-e) PTAA films with various dopant concentrations of OATFSI under illumination

**Table S2.** Electrical property of pristine PTAA film, PTAA film with LiTFSI+tBP, and PTAA films with various dopant concentrations of OATFSI

| Dopant          | Conductivity (S cm <sup>-1</sup> ) |
|-----------------|------------------------------------|
| w/o additive    | 1.41×10 <sup>-7</sup>              |
| LiTFSI+tBP      | 2.99×10 <sup>-5</sup>              |
| OATFSI 4.87 mM  | 3.28×10 <sup>-5</sup>              |
| OATFSI 9.75 mM  | 1.06×10 <sup>-4</sup>              |
| OATFSI 14.62 mM | 1.22×10 <sup>-4</sup>              |

| Dopant Concentration <sup>a</sup> | Scan Direction | $V_{OC}$ (V) | $J_{SC}$ (mA cm <sup>-2</sup> ) | FF    | PCE <sub>max</sub> (%) (PCE <sub>avg</sub> (%)) | $R_s$ (Ω·cm <sup>2</sup> ) | $R_{sh}$ (kΩ·cm <sup>2</sup> ) |
|-----------------------------------|----------------|--------------|---------------------------------|-------|-------------------------------------------------|----------------------------|--------------------------------|
| 0 mM                              | Rev.           | 0.884        | 25.29                           | 0.335 | 7.50 (7.12)                                     | 984.71                     | 16.57                          |
|                                   | Fwd.           | 0.836        | 25.09                           | 0.256 | 5.36 (5.16)                                     | 1210.00                    | 1.22                           |
| 2.44 mM                           | Rev.           | 0.985        | 25.82                           | 0.796 | 20.24 (20.14)                                   | 33.04                      | 27.07                          |
|                                   | Fwd.           | 0.928        | 25.84                           | 0.685 | 16.43 (16.34)                                   | 69.32                      | 68.17                          |
| 4.87 mM                           | Rev.           | 0.997        | 25.41                           | 0.803 | 20.34 (20.20)                                   | 31.59                      | 28.02                          |
|                                   | Fwd.           | 0.952        | 25.39                           | 0.715 | 17.27 (17.32)                                   | 61.03                      | 33.77                          |
| 7.31 mM                           | Rev.           | 0.997        | 25.53                           | 0.810 | 20.63 (20.35)                                   | 27.75                      | 3410.00                        |
|                                   | Fwd.           | 0.962        | 25.48                           | 0.748 | 18.33 (17.99)                                   | 43.07                      | 117.4                          |
| 9.75 mM                           | Rev.           | 1.028        | 25.60                           | 0.822 | 21.63 (21.31)                                   | 23.20                      | 725.32                         |
|                                   | Fwd.           | 0.993        | 25.55                           | 0.775 | 19.65 (19.49)                                   | 33.79                      | 294.01                         |
| 12.18 mM                          | Rev.           | 1.030        | 25.61                           | 0.818 | 21.57 (21.07)                                   | 24.21                      | 21.32                          |
|                                   | Fwd.           | 0.997        | 25.61                           | 0.777 | 19.84 (19.32)                                   | 33.42                      | 39.96                          |
| 14.62 mM                          | Rev.           | 1.036        | 25.17                           | 0.793 | 20.69 (20.03)                                   | 25.28                      | 39.96                          |
|                                   | Fwd.           | 0.948        | 25.08                           | 0.723 | 17.19 (16.63)                                   | 44.57                      | 32.50                          |

**Table S3.** Photovoltaic properties of PSCs using different dopant concentrations of OATFSI

<sup>a</sup>) Devices were fabricated without surface treatment on mp-TiO<sub>2</sub>

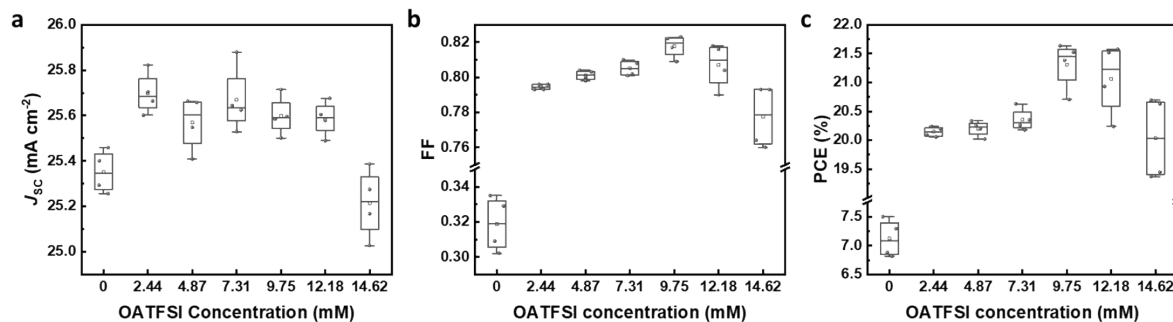

**Fig. S7.** (a)  $J_{SC}$ , (b) FF, and (c) PCE statistics in box-and-whisker plots (center line: median, box limits: upper and lower quartiles, whiskers: 1.5× interquartile range, points: outliers) of PSCs using different dopant concentrations of OATFSI

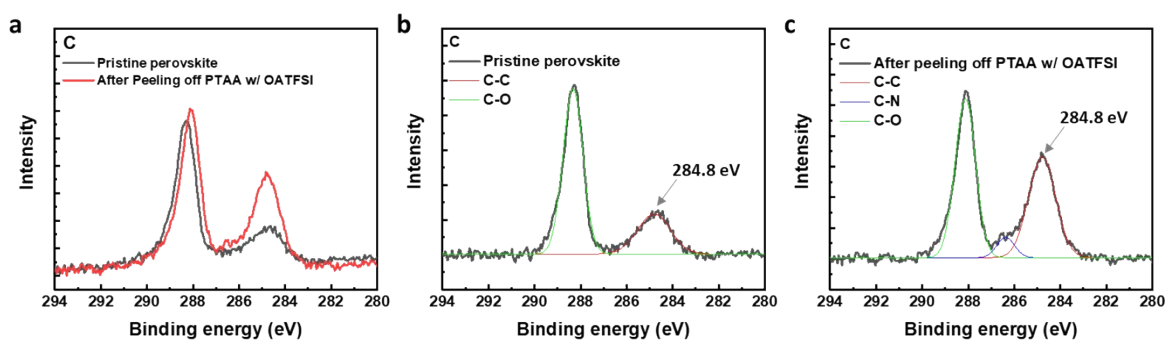

**Fig. S8.** XPS spectra of (a) pristine perovskite layer and perovskite layer after peeling off PTAA film using 9.75 mM of OATFSI with (b-c) the detailed fitting curves

### OA + TFSI on $\text{PbI}_2$ termination

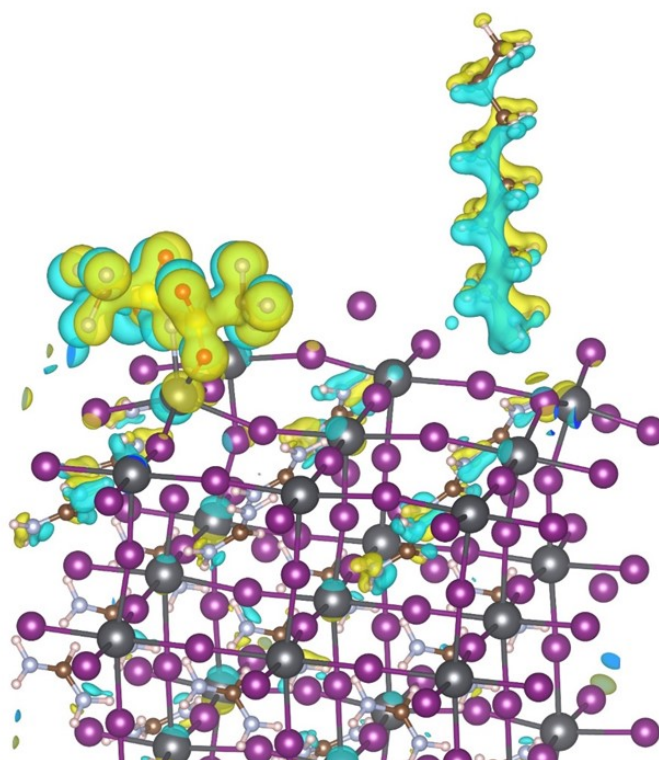

$$\Delta E_{\text{Binding}} = -5.62 \text{ eV}$$

**Fig. S9.** DFT calculation for interaction between the OATFSI and perovskite



| OATFSI Concentration <sup>a</sup> | Surface Treatment | Scan Direction | $V_{OC}$ (V) | $J_{SC}$ (mA cm <sup>-2</sup> ) | FF    | PCE <sub>max</sub> (%) (PCE <sub>avg</sub> (%)) |
|-----------------------------------|-------------------|----------------|--------------|---------------------------------|-------|-------------------------------------------------|
| 4.87 mM                           | X                 | Rev.           | 1.007        | 25.11                           | 0.816 | 20.62 (20.00)                                   |
|                                   |                   | Fwd.           | 0.981        | 25.12                           | 0.785 | 19.34 (18.68)                                   |
| 9.75 mM                           | X                 | Rev.           | 1.073        | 25.00                           | 0.833 | 22.37 (21.93)                                   |
|                                   |                   | Fwd.           | 1.022        | 24.97                           | 0.801 | 20.44 (20.02)                                   |
| 4.87 mM                           | O                 | Rev.           | 1.036        | 25.01                           | 0.822 | 21.31 (20.93)                                   |
|                                   |                   | Fwd.           | 0.999        | 24.95                           | 0.796 | 19.85 (19.43)                                   |
| 9.75 mM                           | O                 | Rev.           | 1.087        | 24.89                           | 0.839 | 22.70 (22.25)                                   |
|                                   |                   | Fwd.           | 1.034        | 24.83                           | 0.796 | 20.42 (20.10)                                   |

**Table S4.** Photovoltaic properties of PSCs before/after surface treatment using OATFSI

<sup>a</sup>) Devices were fabricated with surface treatments on mp-TiO<sub>2</sub> using strontium bis(trifluoromethylsulfonyl)imide. Similar to surface treatments using salt materials on ETLs, surface treatment using strontium bis(trifluoromethylsulfonyl)imide was used to improve the performance of PSCs.<sup>1-4</sup>

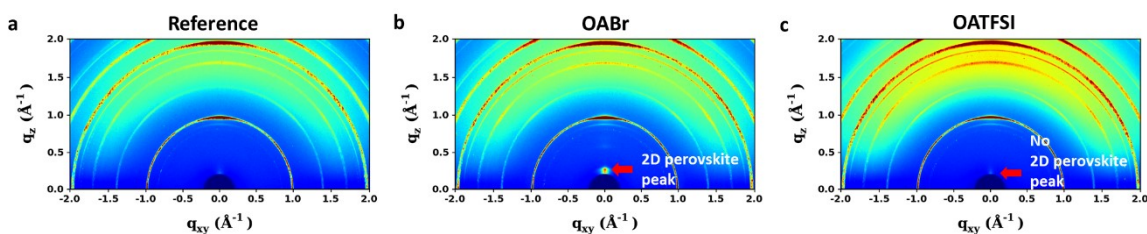

**Fig. S10.** GIWAXS patterns of (a) pristine perovskite, (b) octylammonium bromide (OABr)-treated perovskite, and (c) octylammonium TFSI (OATFSI)-treated perovskite. To obtain surface crystalline profile for the corresponding samples, the incidence angle of the X-ray beam was set to 0.10°

|                                        | Sample 1<br>decay time<br>( $\mu\text{s}$ ) | Sample 2<br>decay time<br>( $\mu\text{s}$ ) | Sample 3<br>decay time<br>( $\mu\text{s}$ ) | Average<br>decay time<br>( $\mu\text{s}$ ) |
|----------------------------------------|---------------------------------------------|---------------------------------------------|---------------------------------------------|--------------------------------------------|
| Pristine perovskite on quartz          | 6.1                                         | 5.3                                         | -                                           | 5.7                                        |
| Perovskite w/ OATFSI surface treatment | 9.7                                         | 10.0                                        | -                                           | 9.8                                        |
| PTAA w/ OATFSI 4.87 mM <sup>a</sup>    | 13.2                                        | 11.9                                        | 13.6                                        | 12.9                                       |
| PTAA w/ OATFSI 9.75 mM <sup>a</sup>    | 27.7                                        | 30.9                                        | 30.0                                        | 29.5                                       |
| PTAA w/ LiTFSI+tBP <sup>a</sup>        | 10.3                                        | 10.3                                        | 11.3                                        | 10.6                                       |

**Table S5.** Summary of long component of lifetime extracting from TCSPC curves

<sup>a</sup>)Perovskite layers were not treated with OATFSI

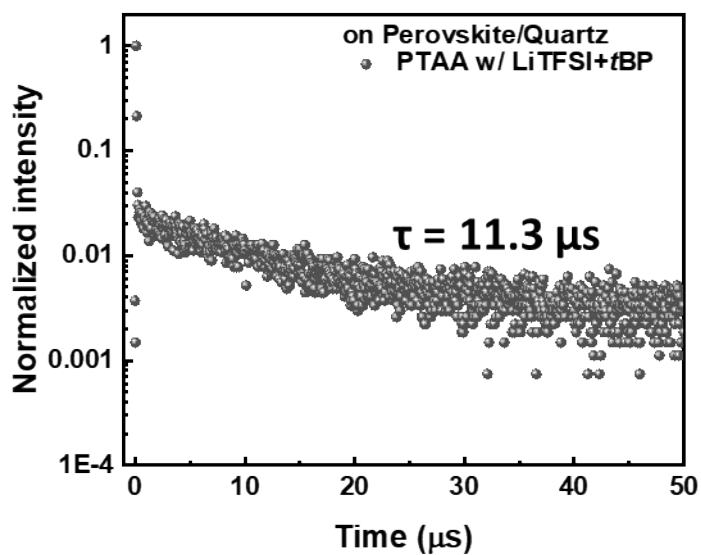

**Fig. S11.** PL transients of perovskite covered by PTAA with LiTFSI+tBP

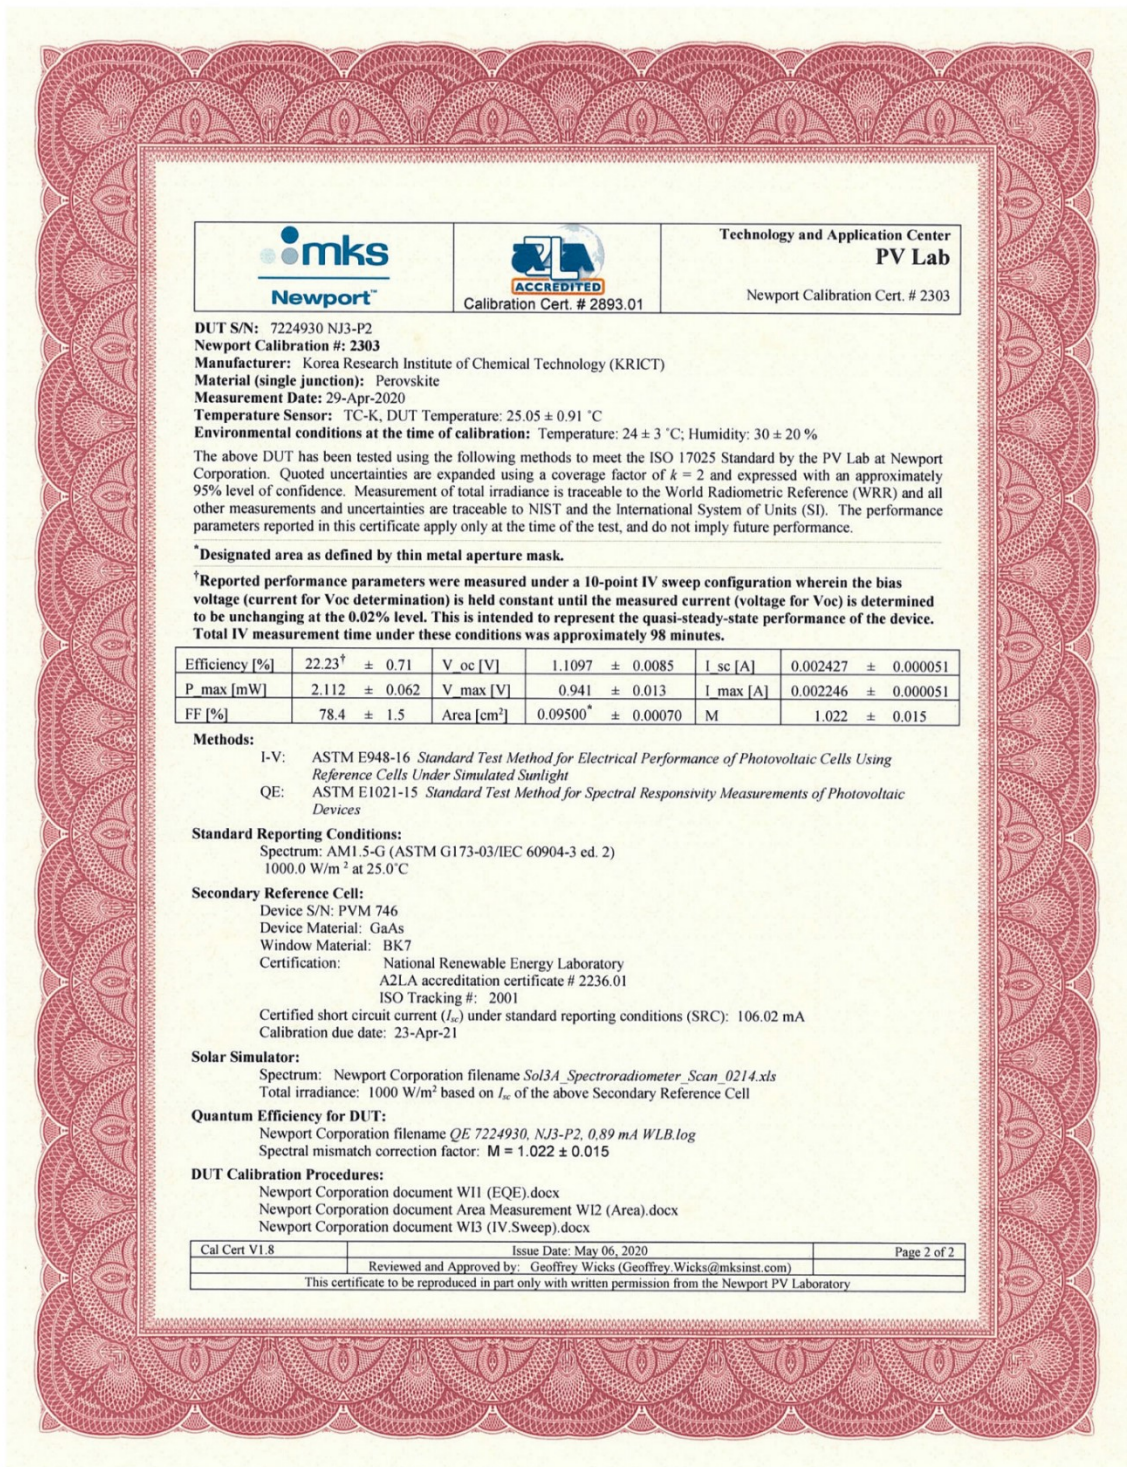

**Fig. S12. (Continued on next page) Certification of OATFSI-based PSC exhibiting QSS PCE of 22.23%**

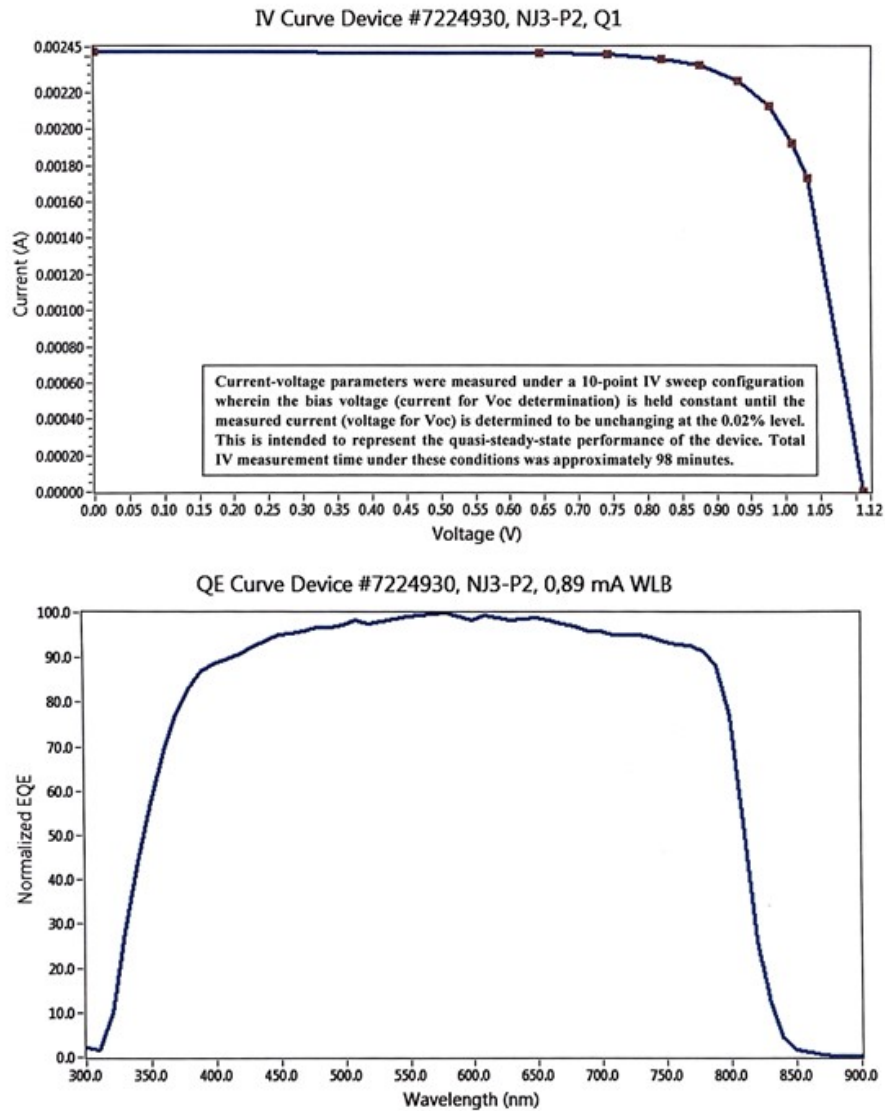

**Fig. S12. (Continued on next page)** Certification of OATFSI-based PSC exhibiting QSS PCE of 22.23%

**Table S6.** Summary of the certified performances (with PCE of over 22%) for PTAA-based PSCs reported to date

| No.       | Structure | Measurement Method          | Certified PCE (%) | dopant        | Reference                                               |
|-----------|-----------|-----------------------------|-------------------|---------------|---------------------------------------------------------|
| This work | n-i-p     | QSS measurement             | 22.2              | OATFSI        | -                                                       |
| 1         | n-i-p     | Reverse/Forward measurement | 22.1              | LiTFSI+tBP    | <i>Science</i> <b>2017</b> , 356, 1376-1379             |
| 2         | n-i-p     | Reverse/Forward measurement | 23.9              | F4TCNQ+LiHFDF | <i>Science</i> <b>2022</b> , 377, 1227-1232             |
| 3         | p-i-n     | QSS measurement             | 22.3              | X             | <i>Nat. Energy</i> <b>2020</b> , 5, 131-140             |
| 4         | p-i-n     | Reverse/Forward measurement | 22.8              | X             | <i>J. Am. Chem. Soc.</i> <b>2020</b> , 142, 20134-20142 |
| 5         | p-i-n     | Reverse/Forward measurement | 24.3              | X             | <i>Science</i> <b>2022</b> , 376, 416-420               |

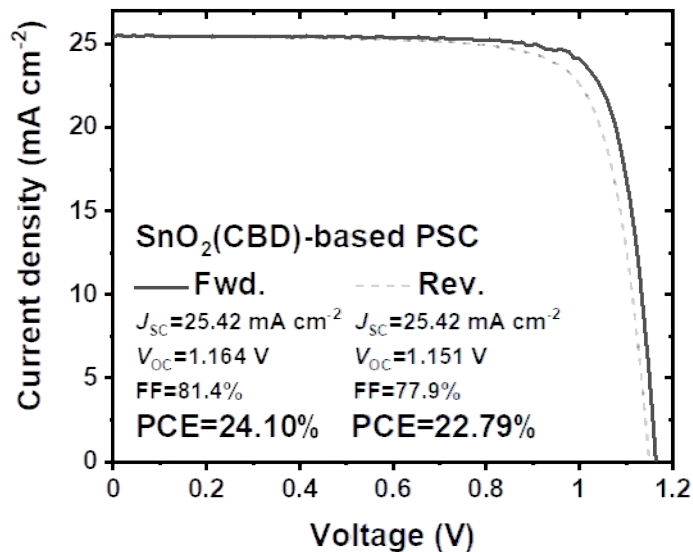

**Fig. S13.**  $J$ - $V$  curve for CBD SnO<sub>2</sub>-based PSC

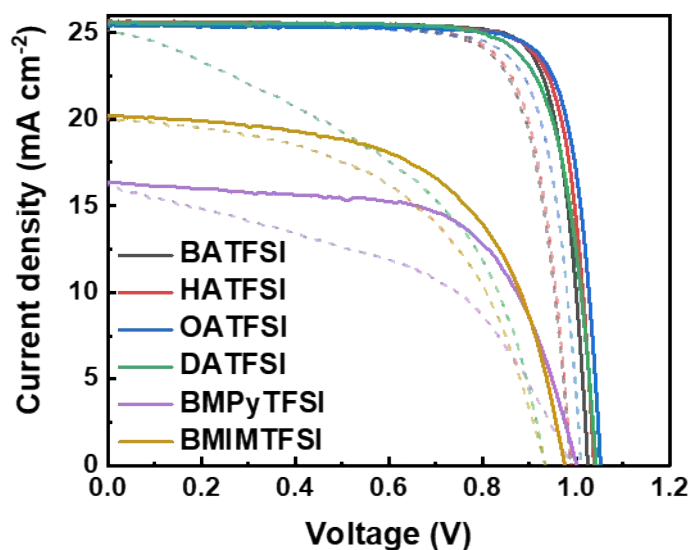

**Fig. S14.**  $J$ - $V$  curves of PSCs using the same concentration of alkylammonium TFSIs with different alkyl chain lengths and commercial ionic liquid dopants

**Table S7.** Photovoltaic properties of PSCs using the same concentration of alkylammonium TFSIs with different alkyl chain lengths and commercial ionic liquid dopants

| Dopant <sup>a</sup> | Scan Direction | $V_{oc}$ (V) | $J_{sc}$ ( $\text{mA cm}^{-2}$ ) | FF    | $\text{PCE}_{\text{max}}$ (%) ( $\text{PCE}_{\text{avg}}$ (%)) |
|---------------------|----------------|--------------|----------------------------------|-------|----------------------------------------------------------------|
| BATFSI              | Rev.           | 1.026        | 25.63                            | 0.821 | 21.59 (21.10)                                                  |
|                     | Fwd.           | 0.991        | 25.59                            | 0.768 | 19.47 (18.51)                                                  |
| HATFSI              | Rev.           | 1.039        | 25.65                            | 0.814 | 21.69 (21.27)                                                  |
|                     | Fwd.           | 0.993        | 25.57                            | 0.775 | 19.67 (19.33)                                                  |
| OATFSI              | Rev.           | 1.052        | 25.41                            | 0.819 | 21.91 (21.38)                                                  |
|                     | Fwd.           | 1.013        | 25.43                            | 0.785 | 20.24 (19.54)                                                  |
| DATFSI              | Rev.           | 1.043        | 25.56                            | 0.784 | 20.90 (20.00)                                                  |
|                     | Fwd.           | 0.936        | 25.11                            | 0.462 | 10.85 (11.57)                                                  |
| BMPyTFSI            | Rev.           | 1.002        | 16.34                            | 0.640 | 10.47 (6.62)                                                   |
|                     | Fwd.           | 0.994        | 16.18                            | 0.471 | 7.57 (3.64)                                                    |
| BMIMTFSI            | Rev.           | 0.976        | 20.17                            | 0.592 | 11.66 (9.52)                                                   |
|                     | Fwd.           | 0.937        | 19.94                            | 0.530 | 9.90 (7.90)                                                    |

<sup>a</sup>Devices were fabricated with surface treatments on mp-TiO<sub>2</sub> using strontium bis(trifluoromethylsulfonyl)imide.

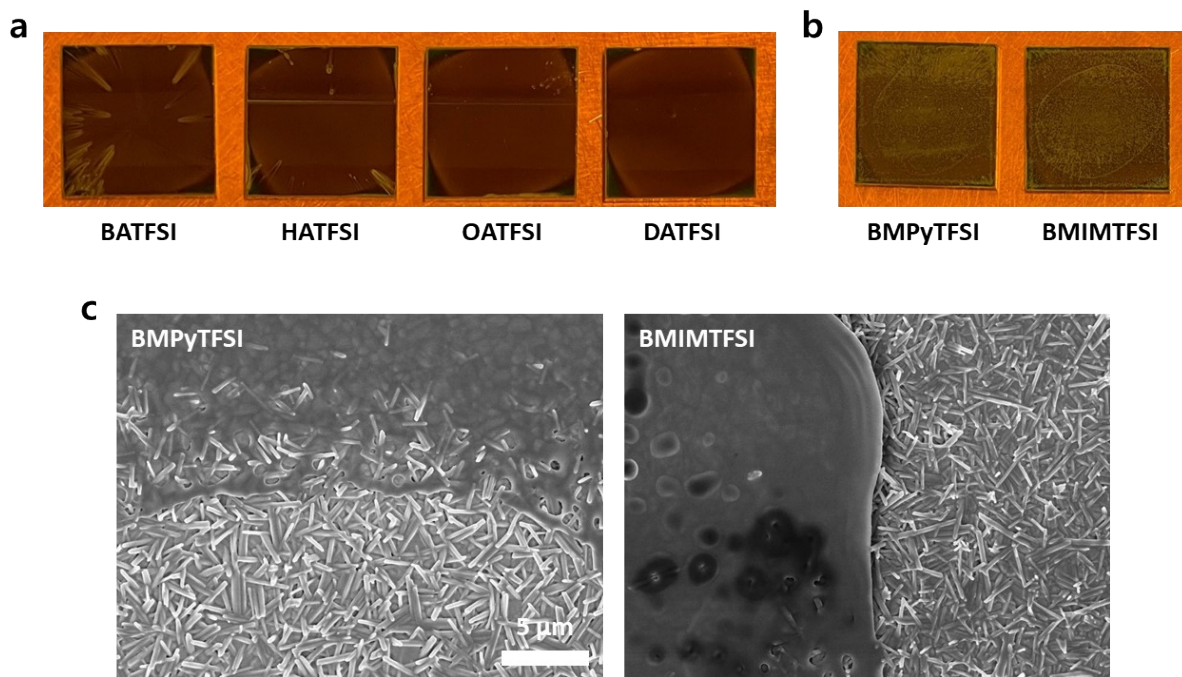

**Fig. S15.** Photographs of (a) HTLs containing alkylammonium TFSIs with different alkyl chain lengths and (b) HTLs containing commercial ionic liquid dopants on the perovskite layers; (c) SEM images of HTLs containing commercial ionic liquid dopants on the perovskite layers

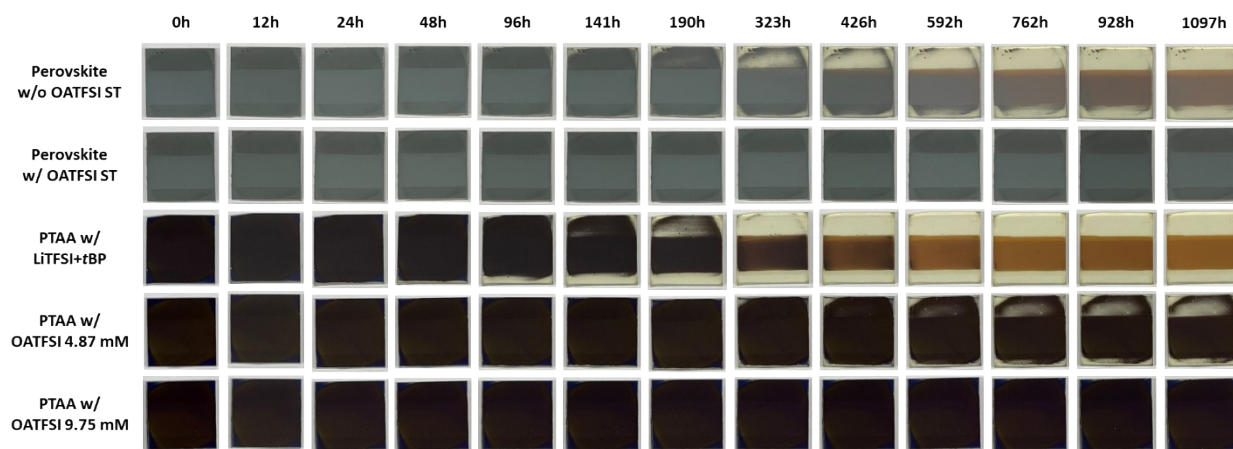

**Fig. S16.** Photographs of changes for perovskite films with and without surface treatment using OATFSI and perovskite films covered by PTAAAs doped by OATFSI and LiTFSI+tBP at 40~55% RH

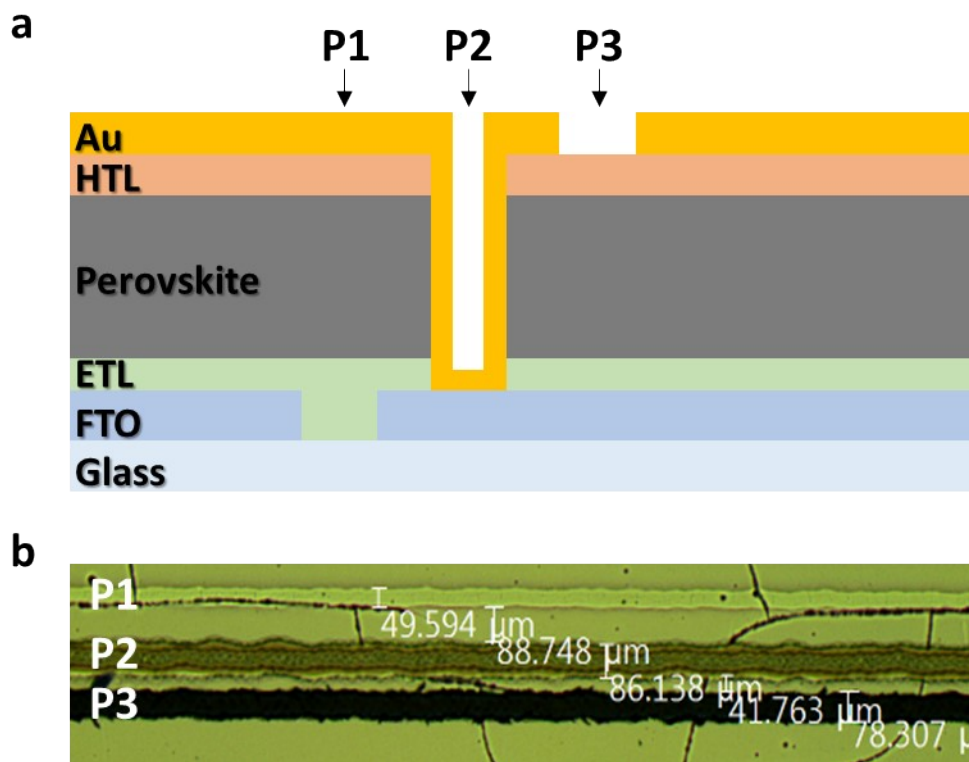

**Fig. S17.** (a) Schematic and (b) optical microscope image of P1, P2, and P3 interconnection lines of the module



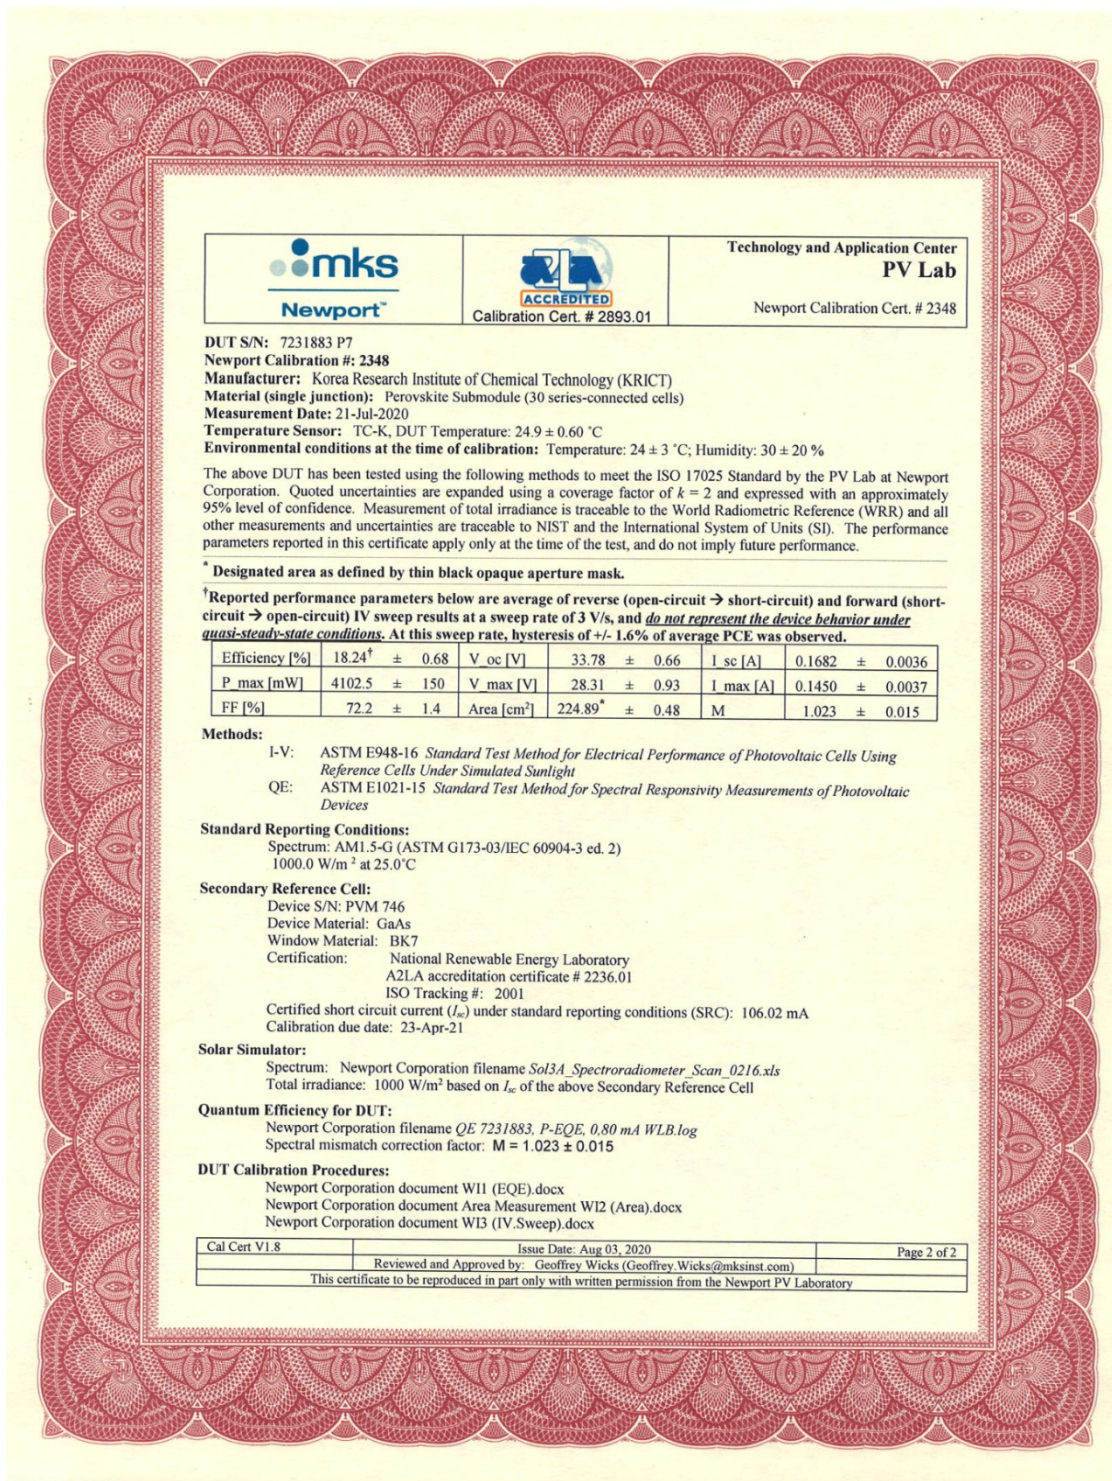

**Fig. S18.** Certification of OATFSI-based perovskite module exhibiting PCE of 18.24%

**Table S8.** Photovoltaic parameters of the perovskite modules using OATFSI

| No.     | $J_{sc}$<br>(mA cm <sup>-2</sup> ) | $V_{oc}$<br>(V) | FF<br>(%)  | PCE in aperture area (225 cm <sup>2</sup> )<br>(%) |
|---------|------------------------------------|-----------------|------------|----------------------------------------------------|
| 1       | 0.72                               | 31.4            | 77.8       | 17.6                                               |
| 2       | 0.69                               | 31.3            | 74.5       | 16.2                                               |
| 3       | 0.70                               | 30.9            | 69.3       | 15.0                                               |
| 4       | 0.70                               | 31.4            | 72.0       | 15.7                                               |
| 5       | 0.67                               | 30.8            | 77.0       | 16.1                                               |
| 6       | 0.72                               | 31.9            | 76.2       | 17.5                                               |
| 7       | 0.69                               | 31.3            | 75.2       | 16.2                                               |
| 8       | 0.71                               | 32.6            | 78.2       | 18.2                                               |
| 9       | 0.69                               | 30.6            | 73.4       | 15.5                                               |
| 10      | 0.72                               | 32.6            | 79.7       | 18.6                                               |
| 11      | 0.71                               | 31.0            | 74.1       | 16.2                                               |
| 12      | 0.72                               | 31.2            | 77.0       | 17.0                                               |
| 13      | 0.72                               | 30.9            | 74.6       | 16.7                                               |
| 14      | 0.68                               | 30.5            | 72.1       | 15.0                                               |
| 15      | 0.73                               | 33.0            | 80.0       | 19.2                                               |
| 16      | 0.70                               | 32.7            | 76.1       | 17.5                                               |
| 17      | 0.73                               | 32.7            | 73.2       | 17.6                                               |
| 18      | 0.75                               | 32.1            | 76.8       | 18.4                                               |
| 19      | 0.71                               | 32.3            | 79.9       | 18.3                                               |
| 20      | 0.72                               | 32.3            | 78.2       | 18.2                                               |
| 21      | 0.71                               | 32.2            | 80.0       | 18.4                                               |
| 22      | 0.71                               | 32.8            | 79.7       | 18.7                                               |
| 23      | 0.71                               | 33.2            | 82.0       | 19.4                                               |
| 24      | 0.71                               | 31.1            | 77.4       | 17.2                                               |
| Average | 0.7105±0.0174                      | 31.83±0.84      | 76.46±3.11 | 17.30±1.30                                         |

## 4.2 시험결과

## 1) I-V 특성 평가

| 구분 | Voc (V)       | Isc (mA) | J <sub>sc</sub> (mA/cm <sup>2</sup> ) | FF (%) | Power (W) | Eff (%) | 비고    |                     |
|----|---------------|----------|---------------------------------------|--------|-----------|---------|-------|---------------------|
| #1 | Ini. (0 h)    | 31.80    | 164.23                                | 0.729  | 67.49     | 3.52    | 15.66 | 225 cm <sup>2</sup> |
|    | Fin. (1 000h) | 29.96    | 158.00                                | 0.702  | 67.28     | 3.19    | 14.16 |                     |
|    | rate (%)      | -5.79    | -3.79                                 | -3.70  | -0.31     | -9.38   | -9.58 |                     |

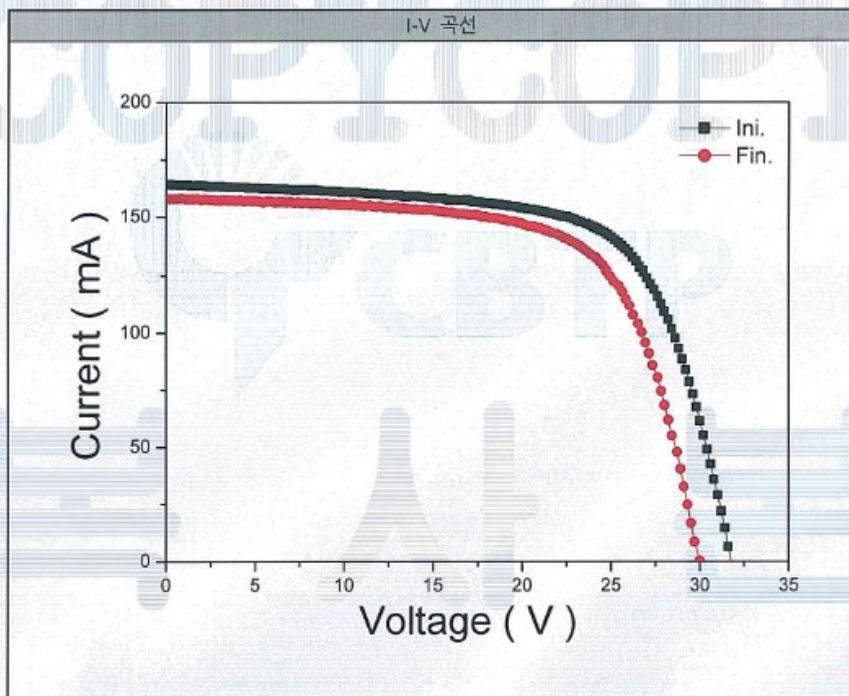

-끝-

**Fig. S19.** Result of outsourcing damp heat test for OATFSI-based perovskite module before and after 1000 h

## Supplemental references

1. M. Kim, I.-w. Choi, S. J. Choi, J. W. Song, S.-I. Mo, J.-H. An, Y. Jo, S. Ahn, S. K. Ahn, G.-H. Kim and D. S. Kim, *Joule*, 2021, **5**, 659-672.
2. X. Liu, Y. Zhang, L. Shi, Z. Liu, J. Huang, J. S. Yun, Y. Zeng, A. Pu, K. Sun, Z. Hameiri, J. A. Stride, J. Seidel, M. A. Green and X. Hao, *Adv. Energy Mater.*, 2018, **8**, 1800138.
3. D. Liu, S. Li, P. Zhang, Y. Wang, R. Zhang, H. Sarvari, F. Wang, J. Wu, Z. Wang and Z. D. Chen, *Nano Energy*, 2017, **31**, 462-468.
4. F. Giordano, A. Abate, J. P. Correa Baena, M. Saliba, T. Matsui, S. H. Im, S. M. Zakeeruddin, M. K. Nazeeruddin, A. Hagfeldt and M. Graetzel, *Nat. Commun.*, 2016, **7**, 10379.
